# Supplementary material for: Experimental Cancer Cachexia Changes Neuron Numbers and Peptide Levels in the Intestine: Partial Protective Effects after Dietary Supplementation with L-Glutamine
Source: PubMed Central journal article supplement (PMC5026352; doi:10.1371/journal.pone.0162998), 2016-09-16
Supplement: pone.0162998.s004.pdf [file pone.0162998.s004.pdf]

**S2 Table.**

|                |       | <b>Experimental Groups</b> |                            |                    |                    |
|----------------|-------|----------------------------|----------------------------|--------------------|--------------------|
|                |       | <b>C</b>                   | <b>CG</b>                  | <b>TW</b>          | <b>TWG</b>         |
| <b>Jejunum</b> | HuC/D | 9451.1 ±                   | 10217.3 ±                  | 9698.1 ±           | 9321.8 ±           |
|                |       | 154.3 <sup>a</sup>         | 257.7 <sup>b</sup>         | 234.2 <sup>a</sup> | 167.4 <sup>a</sup> |
|                | VIP   | 4234.9 ±                   | 4714.1 ± 89.1 <sup>b</sup> | 5206.3 ±           | 4818.2 ±           |
|                |       | 121.1 <sup>a</sup>         |                            | 118.3 <sup>c</sup> | 137.3 <sup>b</sup> |
| <b>Ileum</b>   | HuC/D | 8738.6 ±                   | 8976.4 ±                   | 9809.1 ±           | 7837.4 ±           |
|                |       | 268.5 <sup>a,c</sup>       | 222.3 <sup>a</sup>         | 220.3 <sup>b</sup> | 207.1 <sup>c</sup> |
|                | VIP   | 3985.6 ±                   | 4125.1 ± 90.7 <sup>a</sup> | 4293.3 ±           | 3658.5 ±           |
|                |       | 78.2 <sup>a,b</sup>        |                            | 121.4 <sup>a</sup> | 108.9 <sup>b</sup> |

Means followed by different letters in the same row are significantly different ( $p < 0.05$ ) according to ANOVA (two-way) followed Tukey's post hoc test
